# Supplementary material for: Cytonuclear Coordination Is Not Immediate upon Allopolyploid Formation in Tragopogon miscellus (Asteraceae) Allopolyploids
Source: PubMed Central journal article supplement (PMC4673006; doi:10.1371/journal.pone.0144339), 2015-12-08
Supplement: pone.0144339.s003.pdf [file pone.0144339.s003.pdf]

**S1 Table. List of naturally occurring and synthetic polyploids (*T. miscellus*) and diploid parents (*T. dubius* and *T. pratensis*) examined.**

Data are summarized from genomic DNA and cDNA CAPS and homeolog-specific RT-PCR. Note: Letters “D” and “P” correspond to the diploid parents *T. dubius* and *T. pratensis*, respectively. A ‘D’ or a ‘P’ indicates that only one parental homeolog was detected in genomic DNA or expressed. P>D indicates that the *T. pratensis* homeolog showed higher relative expression than the *T. dubius rbcS-1* homeolog in the *T. miscellus* individual and vice versa for D>P.

| Species             | Population /synthetic generation | Maternal parent (for polyploid) | Unique no./ Synthetic line | Lineage | Retention | Expression |
|---------------------|----------------------------------|---------------------------------|----------------------------|---------|-----------|------------|
| Diploid species     |                                  |                                 |                            |         |           |            |
| <i>T. dubius</i>    | Spokane                          |                                 |                            | 2615-22 | D         | D          |
| <i>T. dubius</i>    | Spokane                          |                                 |                            | 2615-4  | D         | D          |
| <i>T. dubius</i>    | Spangle                          |                                 | 1987                       | 2616-8  | D         | D          |
| <i>T. dubius</i>    | Spangle                          |                                 | 1988                       | 2616-11 | D         | D          |
| <i>T. dubius</i>    | Oakesdale                        |                                 | 1980                       | 2670-9  | D         | D          |
| <i>T. dubius</i>    | Oakesdale                        |                                 | 1981                       | 2670-10 | D         | D          |
| <i>T. dubius</i>    | Garfield                         |                                 | 1938                       | 2687-3  | D         | D          |
| <i>T. dubius</i>    | Garfield                         |                                 | 1943                       | 2687-11 | D         | D          |
| <i>T. dubius</i>    | Pullman                          |                                 | 1073                       | 2613-1  | D         | D          |
| <i>T. dubius</i>    | Pullman                          |                                 | 1095                       | 2613-35 | D         | D          |
| <i>T. dubius</i>    | Troy                             |                                 |                            | 2683-1  | D         | D          |
| <i>T. dubius</i>    | Troy                             |                                 |                            | 2683-7  | D         | D          |
| <i>T. pratensis</i> | Spangle                          |                                 | 2138                       | 2692-1  | P         | P          |
| <i>T. pratensis</i> | Spangle                          |                                 | 2139                       | 2692-2  | P         | P          |
| <i>T. pratensis</i> | Oakesdale                        |                                 | 2150                       | 2672-4  | P         | P          |
| <i>T. pratensis</i> | Oakesdale                        |                                 | 2151                       | 2672-5  | P         | P          |
| <i>T. pratensis</i> | Garfield                         |                                 | 2136                       | 2689-15 | P         | P          |
| <i>T. pratensis</i> | Garfield                         |                                 | 2137                       | 2689-17 | P         | P          |

|                     |           |                     |      |          |      |      |
|---------------------|-----------|---------------------|------|----------|------|------|
| <i>T. pratensis</i> | Moscow    |                     | 1049 | 2608-31  | P    | P    |
| <i>T. pratensis</i> | Moscow    |                     |      | 2608-35X | P    | P    |
| Short-liguled form  |           |                     |      |          |      |      |
| <i>T. miscellus</i> | Spokane   | <i>T. pratensis</i> |      | 2664-3   | Both | -    |
| <i>T. miscellus</i> | Spokane   | <i>T. pratensis</i> |      | 2664-5a  | Both | -    |
| <i>T. miscellus</i> | Spokane   | <i>T. pratensis</i> |      | 2664-5b  | Both | -    |
| <i>T. miscellus</i> | Spokane   | <i>T. pratensis</i> |      | 2664-6   | Both | -    |
| <i>T. miscellus</i> | Spokane   | <i>T. pratensis</i> |      | 2617-1   | Both | -    |
| <i>T. miscellus</i> | Spokane   | <i>T. pratensis</i> |      | 2617-4   | Both | -    |
| <i>T. miscellus</i> | Spokane   | <i>T. pratensis</i> |      | 2617-6   | Both | -    |
| <i>T. miscellus</i> | Spokane   | <i>T. pratensis</i> |      | 2617-7   | Both | -    |
| <i>T. miscellus</i> | Spokane   | <i>T. pratensis</i> |      | 2617-8   | Both | -    |
| <i>T. miscellus</i> | Spokane   | <i>T. pratensis</i> |      | 2617-9   | Both | -    |
| <i>T. miscellus</i> | Spokane   | <i>T. pratensis</i> |      | 2617-12  | Both | -    |
| <i>T. miscellus</i> | Spokane   | <i>T. pratensis</i> |      | 2617-21  | Both | -    |
| <i>T. miscellus</i> | Spangle   | <i>T. pratensis</i> | 2121 | 2693-3   | Both | -    |
| <i>T. miscellus</i> | Spangle   | <i>T. pratensis</i> | 2123 | 2693-5   | Both | -    |
| <i>T. miscellus</i> | Spangle   | <i>T. pratensis</i> | 2125 | 2693-7   | Both | P>D  |
| <i>T. miscellus</i> | Spangle   | <i>T. pratensis</i> | 2126 | 2693-8   | Both | Both |
| <i>T. miscellus</i> | Spangle   | <i>T. pratensis</i> | 2127 | 2693-9   | P    | P    |
| <i>T. miscellus</i> | Spangle   | <i>T. pratensis</i> | 2129 | 2693-11  | P    | P    |
| <i>T. miscellus</i> | Spangle   | <i>T. pratensis</i> | 2130 | 2693-12  | Both | Both |
| <i>T. miscellus</i> | Spangle   | <i>T. pratensis</i> | 2131 | 2693-13  | Both | -    |
| <i>T. miscellus</i> | Spangle   | <i>T. pratensis</i> | 2132 | 2693-14  | Both | -    |
| <i>T. miscellus</i> | Spangle   | <i>T. pratensis</i> | 2133 | 2693-15  | Both | -    |
| <i>T. miscellus</i> | Rosalia   | <i>T. pratensis</i> |      | 2667-3   | Both | -    |
| <i>T. miscellus</i> | Rosalia   | <i>T. pratensis</i> |      | 2667-4   | Both | -    |
| <i>T. miscellus</i> | Oakesdale | <i>T. pratensis</i> | 2055 | 2671-1   | Both | -    |
| <i>T. miscellus</i> | Oakesdale | <i>T. pratensis</i> | 2056 | 2671-2   | Both | P>D  |
| <i>T. miscellus</i> | Oakesdale | <i>T. pratensis</i> | 2057 | 2671-3   | Both | -    |
| <i>T. miscellus</i> | Oakesdale | <i>T. pratensis</i> | 2058 | 2671-4   | Both | Both |
| <i>T. miscellus</i> | Oakesdale | <i>T. pratensis</i> | 2061 | 2671-7   | Both | Both |
| <i>T. miscellus</i> | Oakesdale | <i>T. pratensis</i> | 2063 | 2671-9   | Both | -    |

|                     |           |                     |      |         |      |      |
|---------------------|-----------|---------------------|------|---------|------|------|
| <i>T. miscellus</i> | Oakesdale | <i>T. pratensis</i> | 2064 | 2671-10 | Both | -    |
| <i>T. miscellus</i> | Oakesdale | <i>T. pratensis</i> | 2065 | 2671-11 | Both | P>D  |
| <i>T. miscellus</i> | Garfield  | <i>T. pratensis</i> | 2099 | 2688-1  | Both | -    |
| <i>T. miscellus</i> | Garfield  | <i>T. pratensis</i> | 2100 | 2688-2  | Both | Both |
| <i>T. miscellus</i> | Garfield  | <i>T. pratensis</i> | 2103 | 2688-5  | Both | -    |
| <i>T. miscellus</i> | Garfield  | <i>T. pratensis</i> | 2104 | 2688-6  | Both | Both |
| <i>T. miscellus</i> | Garfield  | <i>T. pratensis</i> | 2106 | 2688-8  | P    | P    |
| <i>T. miscellus</i> | Garfield  | <i>T. pratensis</i> |      | 2688-10 | Both | Both |
| <i>T. miscellus</i> | Garfield  | <i>T. pratensis</i> | 2109 | 2688-11 | Both | Both |
| <i>T. miscellus</i> | Garfield  | <i>T. pratensis</i> | 2110 | 2688-12 | Both | Both |
| <i>T. miscellus</i> | Garfield  | <i>T. pratensis</i> | 2111 | 2688-13 | Both | -    |
| <i>T. miscellus</i> | Albion    | <i>T. pratensis</i> |      | 2625-1  | Both | -    |
| <i>T. miscellus</i> | Albion    | <i>T. pratensis</i> |      | 2625-2  | Both | -    |
| <i>T. miscellus</i> | Albion    | <i>T. pratensis</i> |      | 2625-3  | D    | -    |
| <i>T. miscellus</i> | Albion    | <i>T. pratensis</i> |      | 2625-5  | Both | -    |
| <i>T. miscellus</i> | Albion    | <i>T. pratensis</i> |      | 2625-6  | D    | -    |
| <i>T. miscellus</i> | Albion    | <i>T. pratensis</i> |      | 2625-8  | D    | -    |
| <i>T. miscellus</i> | Albion    | <i>T. pratensis</i> |      | 2625-9  | Both | -    |
| <i>T. miscellus</i> | Albion    | <i>T. pratensis</i> |      | 2625-10 | Both | -    |
| <i>T. miscellus</i> | Moscow    | <i>T. pratensis</i> | 1154 | 2604-4  | Both | -    |
| <i>T. miscellus</i> | Moscow    | <i>T. pratensis</i> | 1157 | 2604-10 | Both | -    |
| <i>T. miscellus</i> | Moscow    | <i>T. pratensis</i> | 1158 | 2604-11 | Both | Both |
| <i>T. miscellus</i> | Moscow    | <i>T. pratensis</i> | 1162 | 2604-15 | Both | Both |
| <i>T. miscellus</i> | Moscow    | <i>T. pratensis</i> |      | 2604-17 | P    | P    |
| <i>T. miscellus</i> | Moscow    | <i>T. pratensis</i> | 1171 | 2604-20 | Both | Both |
| <i>T. miscellus</i> | Moscow    | <i>T. pratensis</i> | 1173 | 2604-22 | P    | P    |
| <i>T. miscellus</i> | Moscow    | <i>T. pratensis</i> | 1176 | 2604-24 | Both | -    |
| <i>T. miscellus</i> | Moscow    | <i>T. pratensis</i> | 1186 | 2604-35 | Both | -    |
| <i>T. miscellus</i> | Moscow    | <i>T. pratensis</i> | 1402 | 2604-43 | Both | P>D  |
| <i>T. miscellus</i> | Troy      | <i>T. pratensis</i> |      | 2682-1  | Both | -    |
| <i>T. miscellus</i> | Troy      | <i>T. pratensis</i> |      | 2682-2  | Both | -    |
| <i>T. miscellus</i> | Troy      | <i>T. pratensis</i> |      | 2682-3  | Both | -    |
| <i>T. miscellus</i> | Troy      | <i>T. pratensis</i> |      | 2682-4  | Both | -    |

|                      |                |                     |          |         |      |      |
|----------------------|----------------|---------------------|----------|---------|------|------|
| <i>T. miscellus</i>  | Troy           | <i>T. pratensis</i> |          | 2682-5  | P    | -    |
| <i>T. miscellus</i>  | Troy           | <i>T. pratensis</i> |          | 2682-6  | Both | -    |
| <i>T. miscellus</i>  | Troy           | <i>T. pratensis</i> |          | 2682-7  | Both | -    |
| <i>T. miscellus</i>  | Troy           | <i>T. pratensis</i> |          | 2682-11 | Both | -    |
| <i>T. miscellus</i>  | Troy           | <i>T. pratensis</i> |          | 2682-12 | Both | -    |
| Long-liguled form    |                |                     |          |         |      |      |
| <i>T. miscellus</i>  | Pullman        | <i>T. dubius</i>    |          | 2605-3  | Both | Both |
| <i>T. miscellus</i>  | Pullman        | <i>T. dubius</i>    | 1194     | 2605-4  | Both | -    |
| <i>T. miscellus</i>  | Pullman        | <i>T. dubius</i>    | 1196     | 2605-7  | Both | Both |
| <i>T. miscellus</i>  | Pullman        | <i>T. dubius</i>    |          | 2605-9  | Both | D>P  |
| <i>T. miscellus</i>  | Pullman        | <i>T. dubius</i>    | 1203     | 2605-13 | Both | Both |
| <i>T. miscellus</i>  | Pullman        | <i>T. dubius</i>    | 1204     | 2605-14 | Both | Both |
| <i>T. miscellus</i>  | Pullman        | <i>T. dubius</i>    | 1210     | 2605-24 | Both | Both |
| <i>T. miscellus</i>  | Pullman        | <i>T. dubius</i>    | 1211     | 2605-28 | D    | D    |
| <i>T. miscellus</i>  | Pullman        | <i>T. dubius</i>    | 1212     | 2605-29 | Both | Both |
| <i>T. miscellus</i>  | Pullman        | <i>T. dubius</i>    | 1216     | 2605-42 | Both | Both |
| <i>T. miscellus</i>  | Pullman        | <i>T. dubius</i>    | 1221     | 2605-46 | Both | D>P  |
| Synthetic polyploids |                |                     |          |         |      |      |
| <i>T. miscellus</i>  | S <sub>0</sub> | <i>T. pratensis</i> | 111-1    |         | Both | -    |
| <i>T. miscellus</i>  | S <sub>1</sub> | <i>T. pratensis</i> | 111-1-7  |         | Both | -    |
| <i>T. miscellus</i>  | S <sub>1</sub> | <i>T. pratensis</i> | 111-1-8  |         | Both | -    |
| <i>T. miscellus</i>  | S <sub>1</sub> | <i>T. pratensis</i> | 111-1-23 |         | Both | Both |
| <i>T. miscellus</i>  | S <sub>0</sub> | <i>T. pratensis</i> | 111-4    |         | Both | -    |
| <i>T. miscellus</i>  | S <sub>1</sub> | <i>T. pratensis</i> | 111-4-4  |         | Both | -    |
| <i>T. miscellus</i>  | S <sub>1</sub> | <i>T. pratensis</i> | 111-4-17 |         | Both | Both |
| <i>T. miscellus</i>  | S <sub>0</sub> | <i>T. pratensis</i> | 111-5    |         | Both | -    |
| <i>T. miscellus</i>  | S <sub>1</sub> | <i>T. pratensis</i> | 111-5-7  |         | Both | -    |
| <i>T. miscellus</i>  | S <sub>1</sub> | <i>T. pratensis</i> | 111-5-9  |         | Both | -    |
| <i>T. miscellus</i>  | S <sub>1</sub> | <i>T. pratensis</i> | 111-5-18 |         | Both | Both |
| <i>T. miscellus</i>  | S <sub>0</sub> | <i>T. pratensis</i> | 111-7    |         | Both | -    |
| <i>T. miscellus</i>  | S <sub>1</sub> | <i>T. pratensis</i> | 111-7-11 |         | Both | Both |
| <i>T. miscellus</i>  | S <sub>1</sub> | <i>T. pratensis</i> | 67-2-1   |         | Both | -    |

|                     |                |                     |          |  |      |      |
|---------------------|----------------|---------------------|----------|--|------|------|
| <i>T. miscellus</i> | S <sub>1</sub> | <i>T. pratensis</i> | 67-2-4   |  | Both | -    |
| <i>T. miscellus</i> | S <sub>1</sub> | <i>T. pratensis</i> | 67-2-7   |  | Both | Both |
| <i>T. miscellus</i> | S <sub>1</sub> | <i>T. pratensis</i> | 67-3-6   |  | Both | -    |
| <i>T. miscellus</i> | S <sub>1</sub> | <i>T. pratensis</i> | 67-3-8   |  | Both | -    |
| <i>T. miscellus</i> | S <sub>0</sub> | <i>T. pratensis</i> | 79-1     |  | Both | -    |
| <i>T. miscellus</i> | S <sub>1</sub> | <i>T. pratensis</i> | 79-1-3   |  | Both | -    |
| <i>T. miscellus</i> | S <sub>1</sub> | <i>T. pratensis</i> | 79-11-3  |  | Both | -    |
| <i>T. miscellus</i> | S <sub>0</sub> | <i>T. dubius</i>    | 119-2    |  | Both | -    |
| <i>T. miscellus</i> | S <sub>0</sub> | <i>T. dubius</i>    | 129-7    |  | Both | -    |
| <i>T. miscellus</i> | S <sub>1</sub> | <i>T. dubius</i>    | 129-7-1  |  | Both | -    |
| <i>T. miscellus</i> | S <sub>1</sub> | <i>T. dubius</i>    | 129-7-14 |  | Both | Both |
