# Supplementary material for: Cytonuclear Coordination Is Not Immediate upon Allopolyploid Formation in Tragopogon miscellus (Asteraceae) Allopolyploids
Source: PubMed Central journal article supplement (PMC4673006; doi:10.1371/journal.pone.0144339), 2015-12-08
Supplement: pone.0144339.s004.pdf [file pone.0144339.s004.pdf]

**S1 Table. Transcription factor binding sites in *Tragopogon rbcS-1* promoter region as determined by Plant Promoter Analysis Navigator (PlantPAN).**

| Transcription factor | Site | Sequence           | Species                                          |
|----------------------|------|--------------------|--------------------------------------------------|
| AGL3                 | 11   | atacCCATAacgtatcag | <i>Arabidopsis</i>                               |
| Athb-1               | 254  | tgaggATTATatca     | <i>Arabidopsis</i>                               |
| ATHB-9               | 91   | ttggtaATGATaaggcat | <i>Arabidopsis</i>                               |
| CDC5                 | 22   | gtaTCAGCctc        | <i>Arabidopsis</i>                               |
| PIF3                 | 65   | ccctgcCACGTgtcacat | <i>Arabidopsis</i>                               |
| ABRELATED1           | 72   | ACGTG              | <i>Arabidopsis</i>                               |
| ANAERO1CONSENSUS     | 202  | TTTGTTT            | Maize/ <i>Arabidopsis</i> /Pea/Barley/<br>Rice   |
| CACGTGMOTIF          | 71   | CACGTG             | Tomato/ <i>Arabidopsis</i> /Snapdragon/<br>Wheat |
| Core                 | 1    | ATTA               | <i>Arabidopsis</i>                               |
| Core                 | 108  | ATTA               | <i>Arabidopsis</i>                               |
| GATABOX              | 100  | GATA               | <i>Petunia/Arabidopsis/Rice</i>                  |
| GATABOX              | 196  | GATA               | <i>Petunia/Arabidopsis/Rice</i>                  |
| GATABOX              | 263  | TATC               | <i>Petunia/Arabidopsis/Rice</i>                  |
| GBOXLERBCS           | 69   | GCCACGTGT          | Tomato/ <i>Arabidopsis</i>                       |
| GT1CONSENSUS         | 108  | ATTACC             | Pea/Oat/Rice/Tobacco/ <i>Arabidopsis</i>         |
| HY5AT                | 68   | TGCCACGTGTCA       | <i>Arabidopsis</i>                               |
| IBOXCORENT           | 100  | GATAAGG            | Tobacco                                          |
| IBOXCORENT           | 48   | GATAAGG            | tobacco                                          |
| IBOX                 | 100  | GATAAG             | Tomato/ <i>Arabidopsis</i>                       |
| IBOX                 | 48   | GATAAG             | Tomato/ <i>Arabidopsis</i>                       |
| LRENPCABE            | 68   | TGCCACGT           | Tobacco                                          |
| MYB2COREATCYCB1      | 213  | CCGTT              | <i>Arabidopsis</i>                               |
| RBCSCONSENSUS        | 272  | TTGGATT            | Tomato/ <i>petunia</i> /Tobacco/Pea              |

|            |     |       |                    |
|------------|-----|-------|--------------------|
| SORLIP1AT  | 158 | GCCAC | <i>Arabidopsis</i> |
| SORLIP1AT  | 69  | GCCAC | <i>Arabidopsis</i> |
| WBOXNTERF3 | 82  | TGACC | Tobacco            |
